# Supplementary material for: ISMAR: an airborne submillimetre radiometer
Source: Copernicus journal article supplement (doi:10.5194/amt-10-477-2017), 2017-02-08
Supplement: Supplementary file 1 [file amt-10-477-2017-supplement.zip]

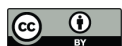

## *Supplement of*

## **ISMAR: an airborne submillimetre radiometer**

**Stuart Fox et al.**

*Correspondence to:* Stuart Fox ([stuart.fox@metoffice.gov.uk](mailto:stuart.fox@metoffice.gov.uk))

- [amt-10-477-2017-supplement-title-page.pdf](#)
- [atmospheric\\_profile\\_b893.csv](#)
- [atmospheric\\_profile\\_b940.csv](#)
- [zenith\\_views\\_b893.csv](#)
- [zenith\\_views\\_b940.csv](#)

The copyright of individual parts of the supplement might differ from the CC-BY 3.0 licence.
